# Supplementary material for: Scalar activity induced phase separation and liquid–solid transition in a Lennard-Jones system
Source: Royal Society of Chemistry journal article supplement (doi:10.1039/c9sm00962k), 2019-01-01
Supplement: c9sm00962k1.pdf [file c9sm00962k1.pdf]

# Supplemental Material : Scalar activity induced phase separation and liquid-solid transition in Lennard-Jones system

(a)

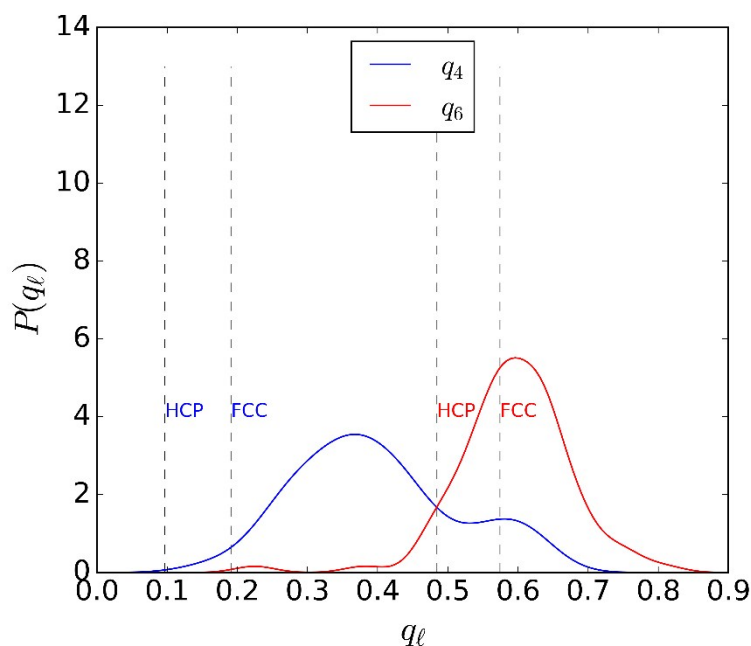

(b)

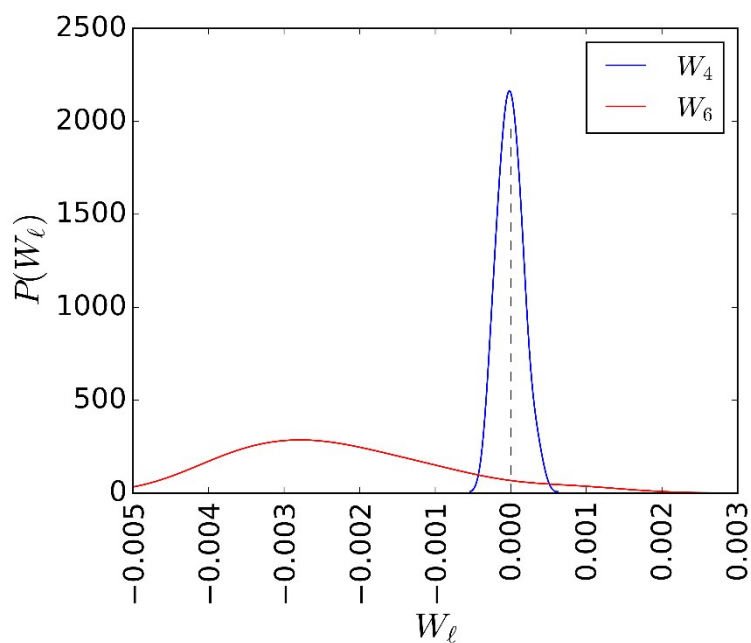

Figure SF1. (color online) Distributions of (a)  $q_4, q_6$ , (b)  $W_4, W_6$ , obtained only for hot particles, for the system with density  $\rho^* = 0.1$  and  $N = 8000$ , at  $T_h^* = 80$ .

(a)

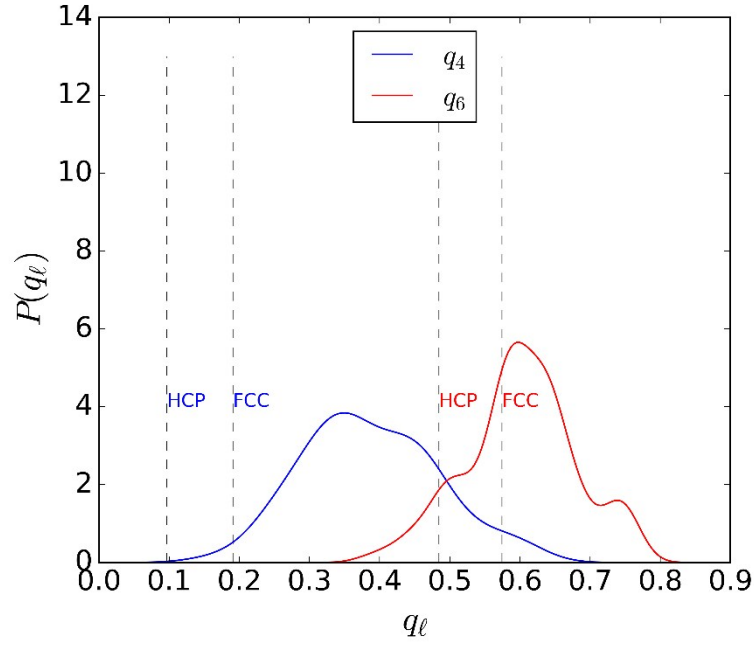

(b)

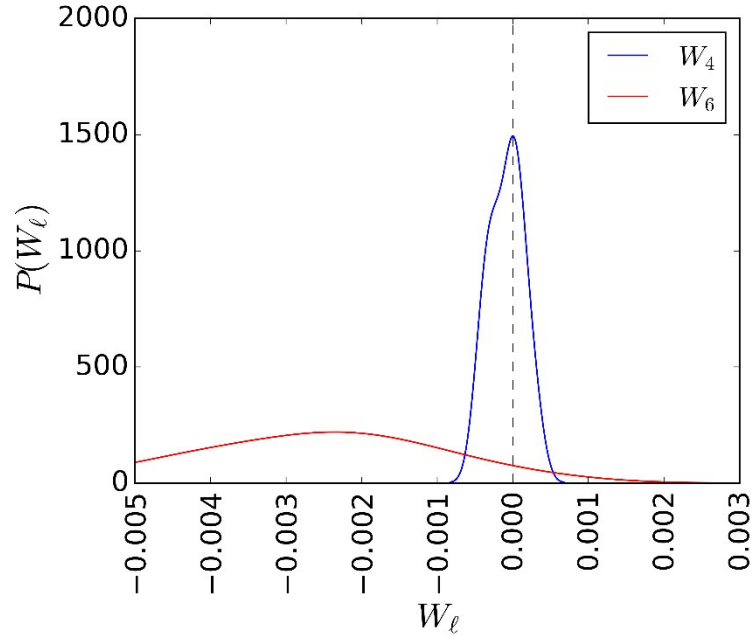

Figure SF2. (color online) Distributions of (a)  $q_4, q_6$ , (b)  $W_4, W_6$ , obtained only for hot particles, for the system with density  $\rho^* = 0.2$  and  $N = 8000$ , at  $T_h^* = 80$ .

(a)

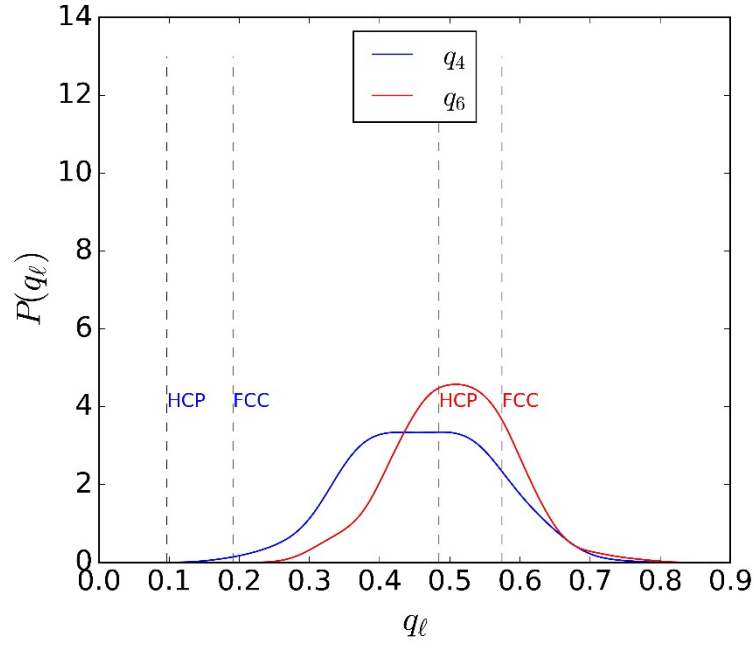

(b)

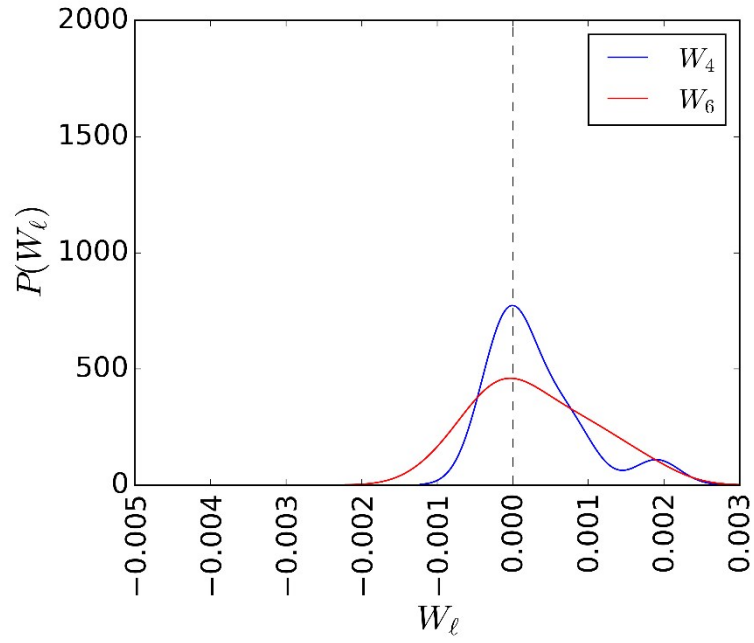

Figure SF3. (color online) Distributions of (a)  $q_4, q_6$ , (b)  $W_4, W_6$ , obtained only for hot particles, for the system with density  $\rho^* = 0.5$  and  $N = 8000$ , at  $T_h^* = 80$ .

(a)

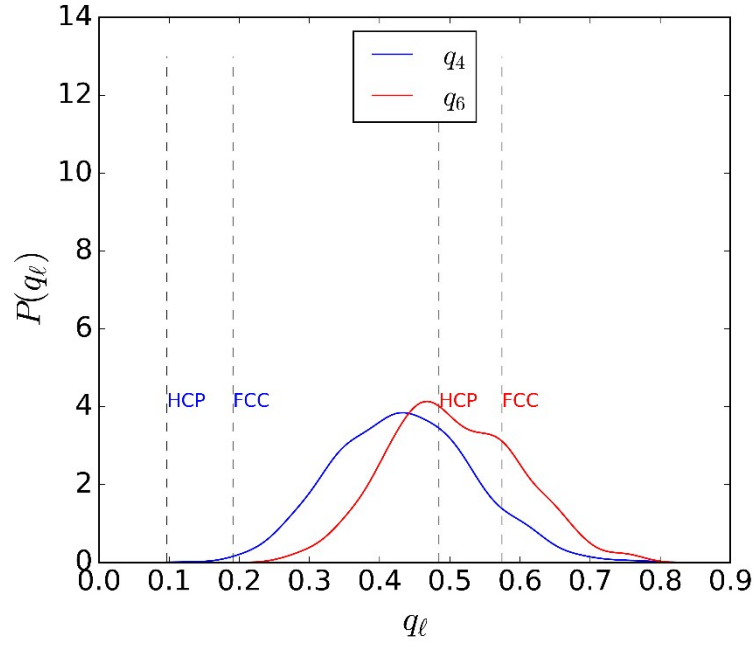

(b)

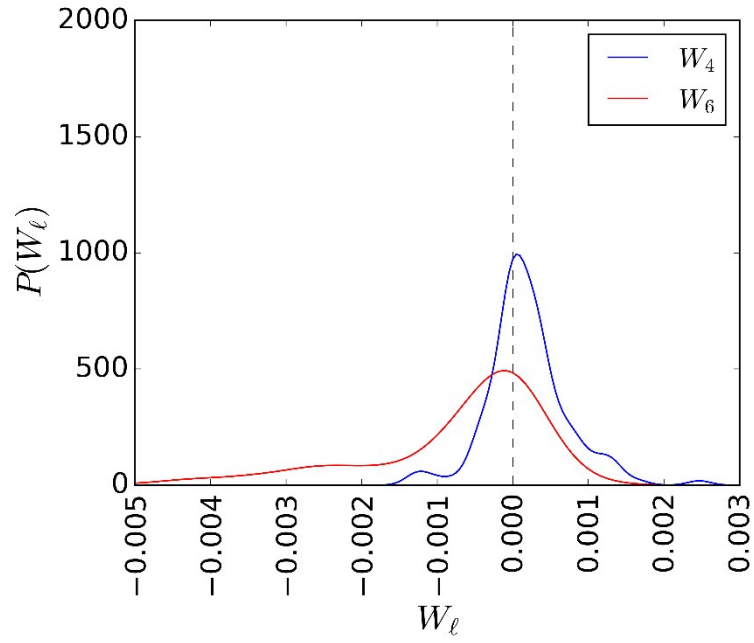

Figure SF4. (color online) Distributions of (a)  $q_4, q_6$ , (b)  $W_4, W_6$ , obtained only for hot particles, for the system with density  $\rho^* = 0.8$  and  $N = 8000$ , at  $T_h^* = 80$ .

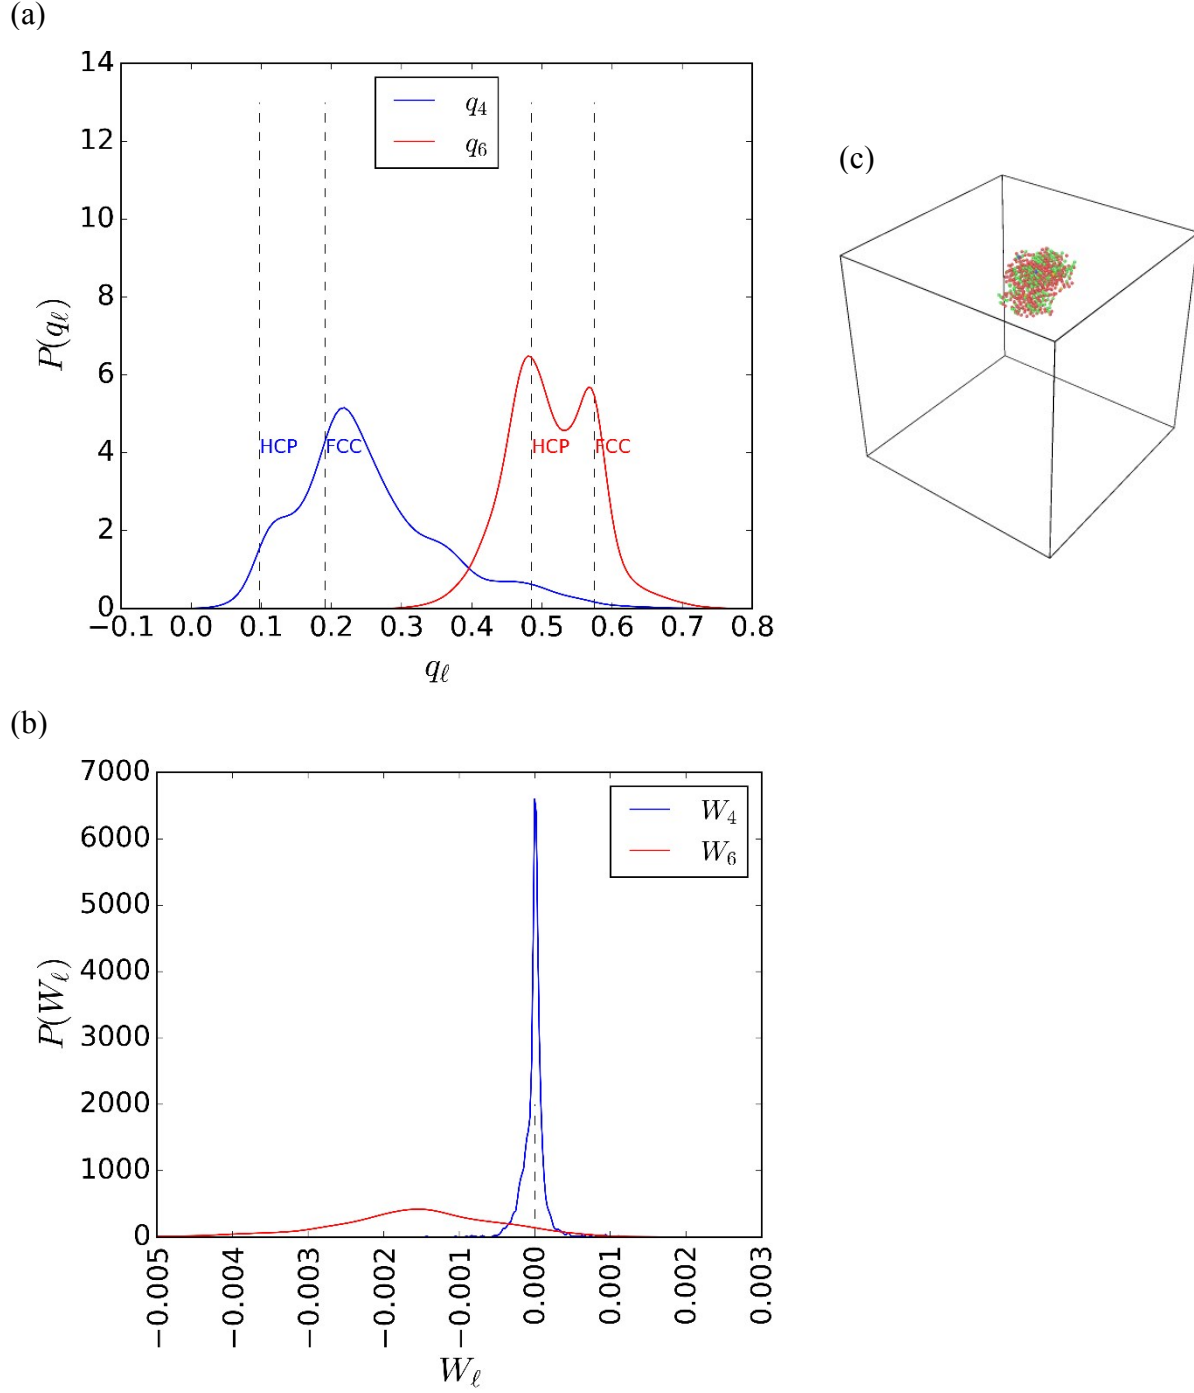

Figure SF5. (color online) System with  $\rho^* = 0.1$  : (a). From the distributions of  $q_4, q_6$  indicating both FCC and HCP arrangement in the segregation. (b). The range of  $W_6$  and  $W_4$  also confirms the same (c). snapshot of the system with common neighbor analysis (CNA); green and red colors represent the FCC and HCP structures respectively. The snapshots and the CNA are performed using OVITO software.

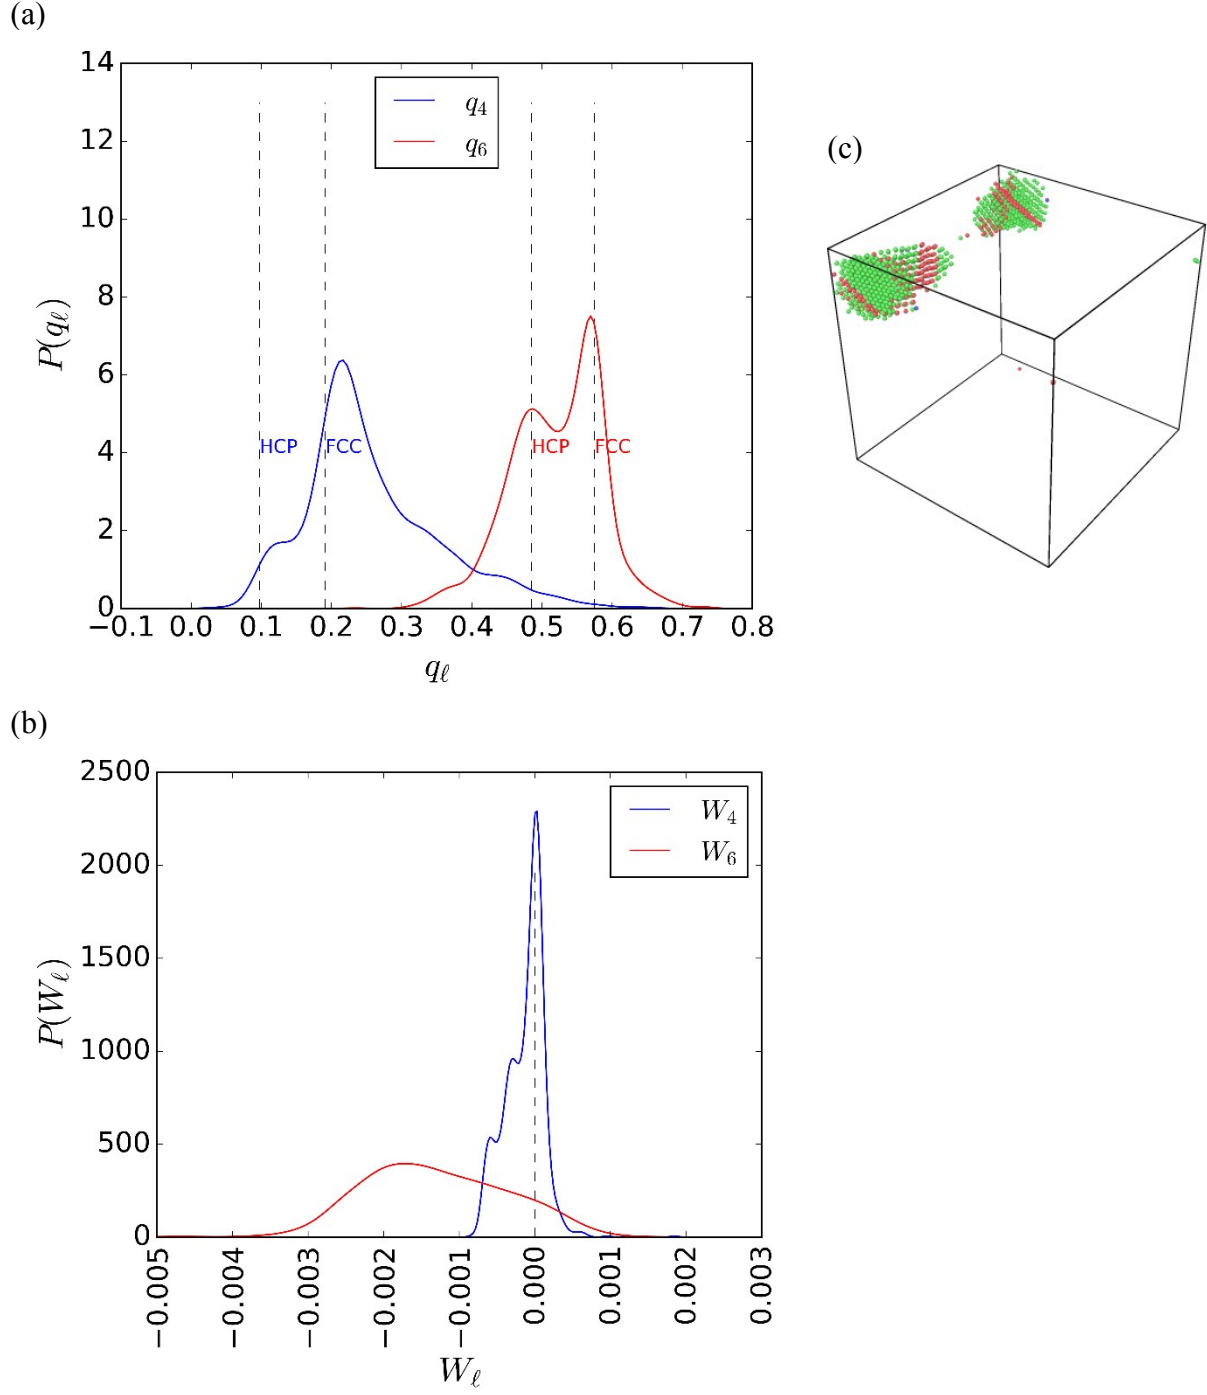

Figure SF6. (color online) Distributions of (a).  $q_4$ ,  $q_6$  and (b).  $W_4$ ,  $W_6$  parameters, at the density of  $\rho^* = 0.2$ . (c). snapshot of the system with CNA, green and red corresponds to FCC and HCP respectively.

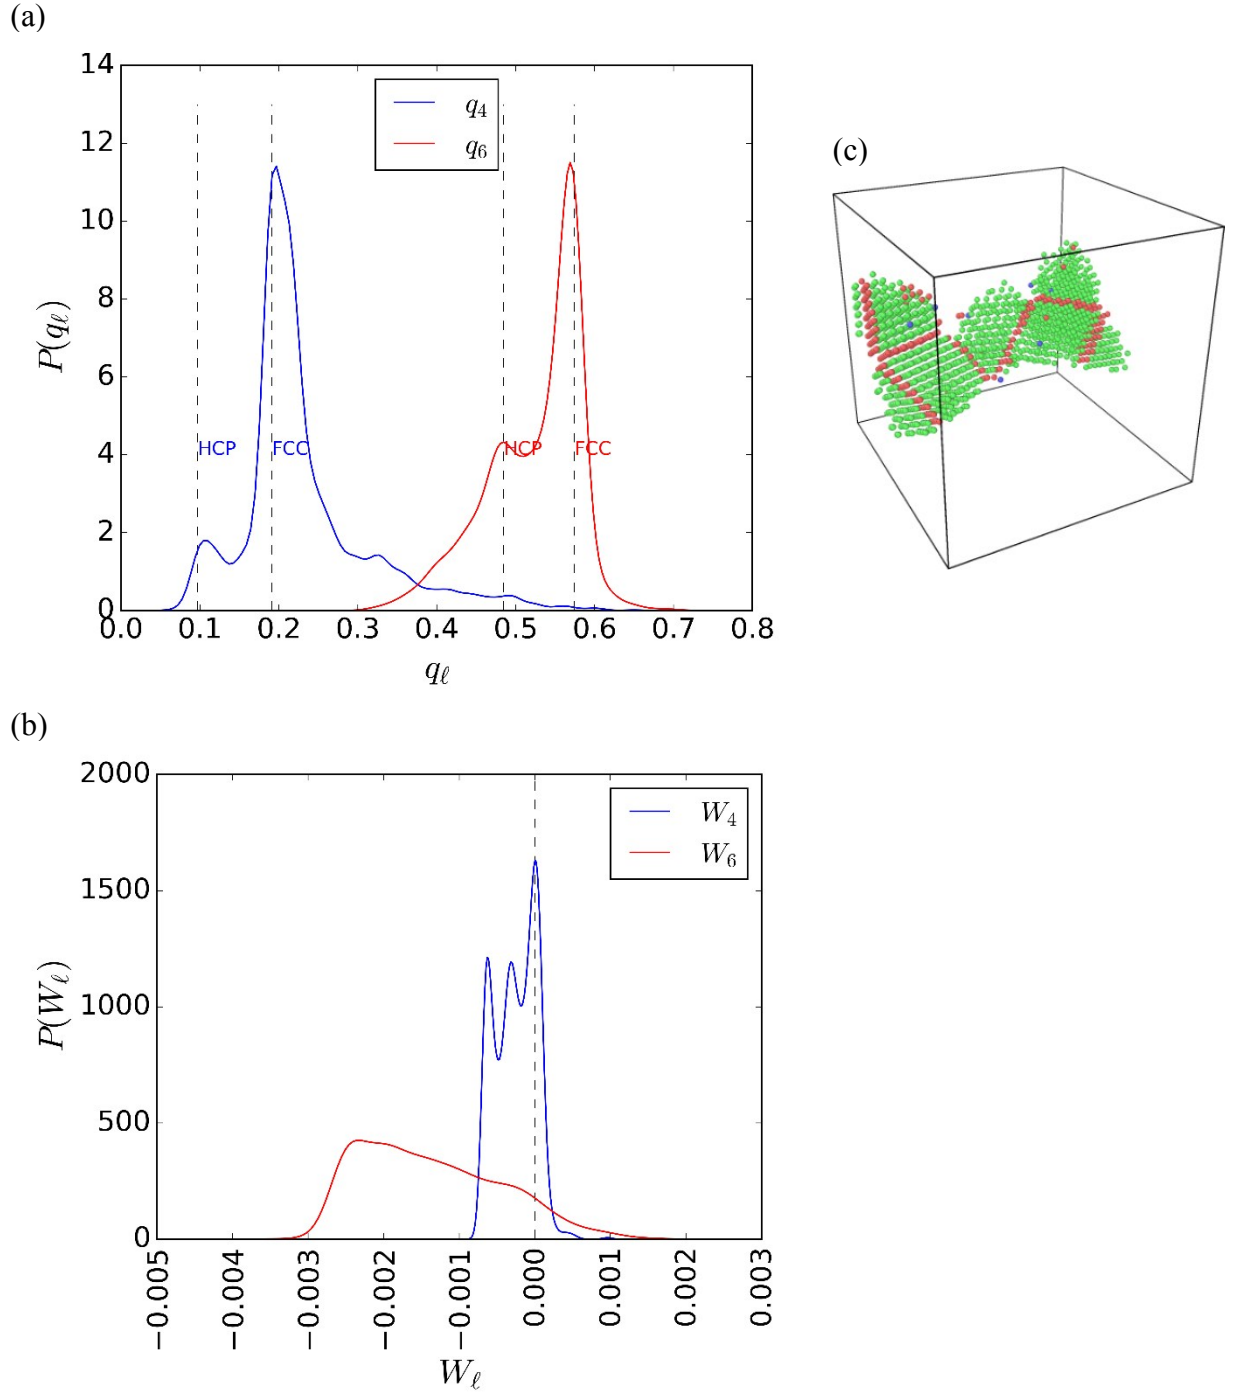

Figure SF7. (color online) Distributions of (a).  $q_4$ ,  $q_6$  and (b).  $W_4$ ,  $W_6$  parameters, at the density of  $\rho^* = 0.5$ . (c). system snapshot with CNA, green and red color denote the FCC and HCP arrangements respectively.

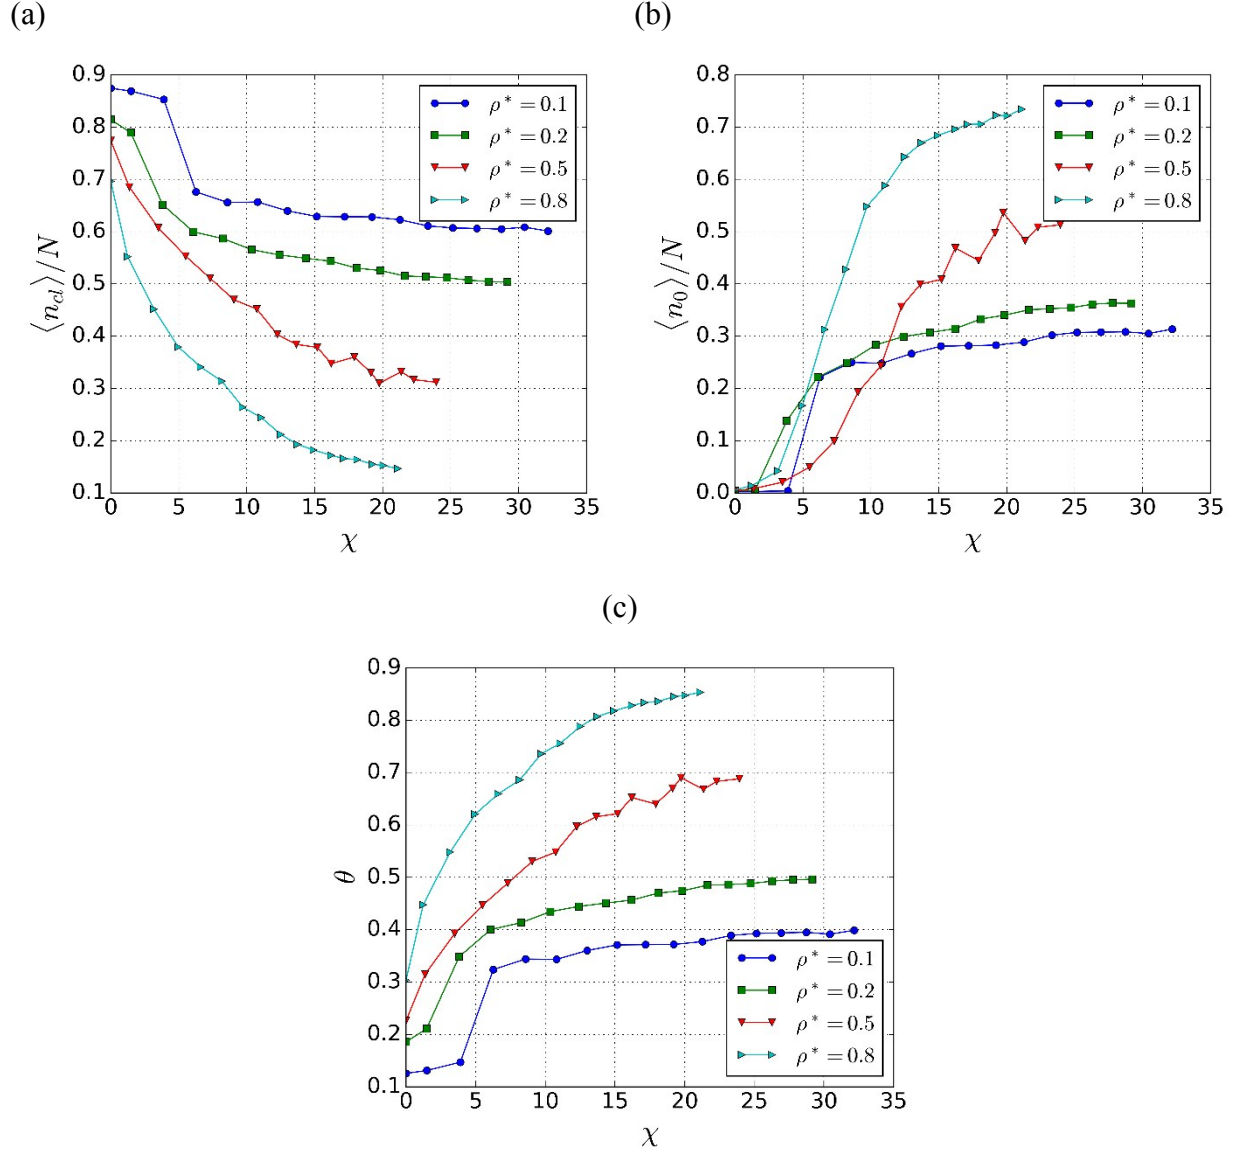

Figure SF8. (color online) (a). Mean number of clusters normalized with total number of particles  $N$ . (b). average population of the largest cluster (normalized) (c). clustering parameter  $\theta$ ; all are plotted as a function of the activity parameter  $\chi$ ; for the case of  $N = 2000$ .

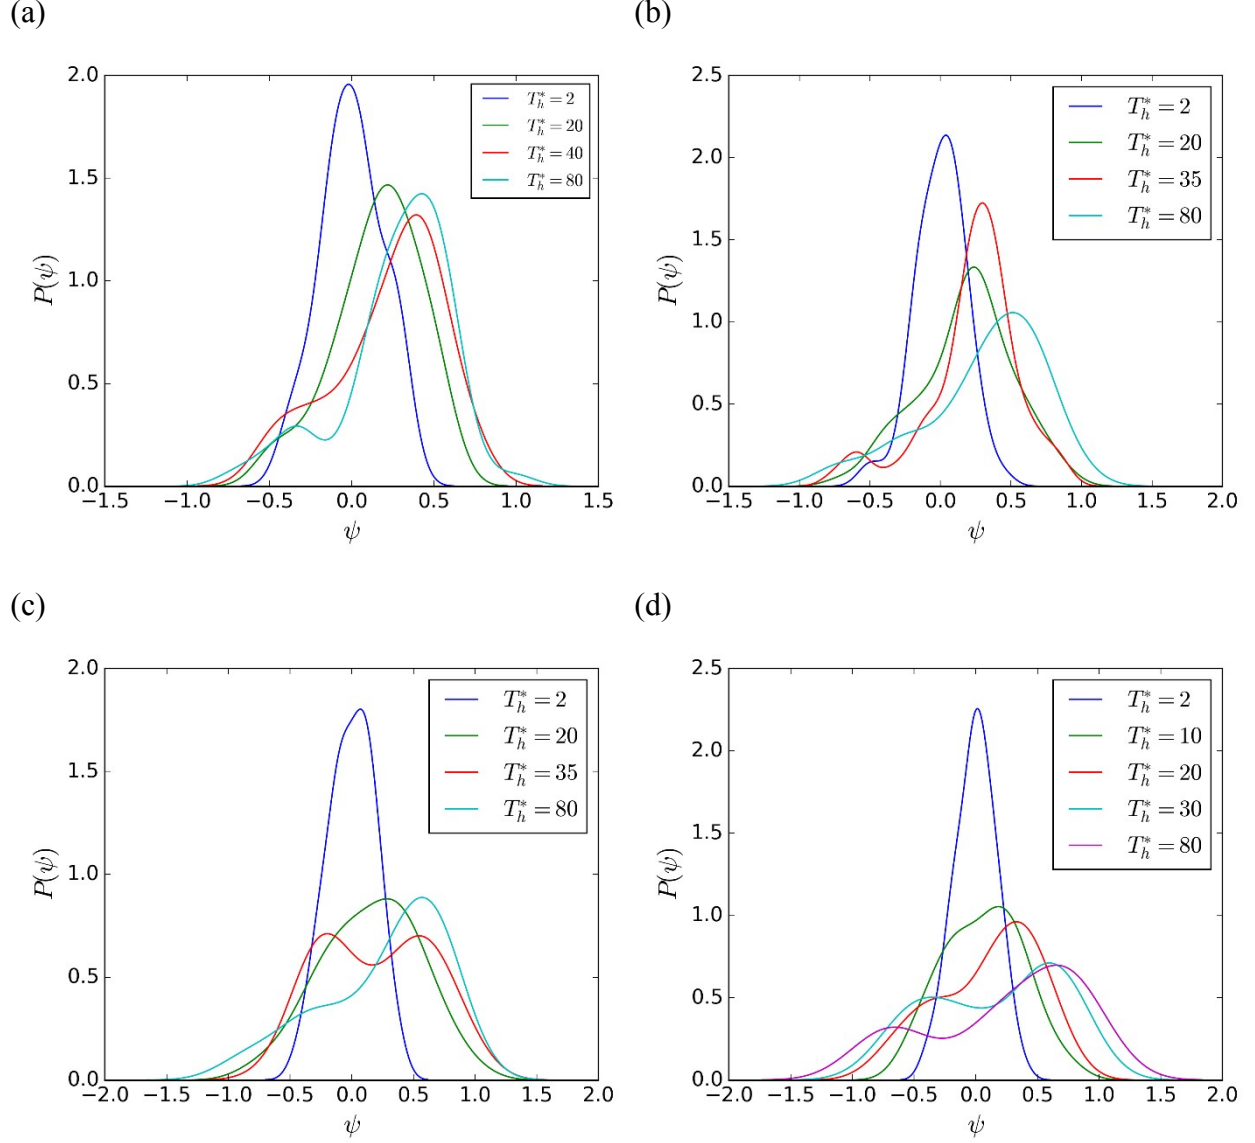

Figure SF9. (color online) Distributions  $P(\psi)$ , at the respective hot particles' temperature (for  $N = 2000$ ). (a), (b), (c) and (d) correspond to the systems at the density of  $\rho^* = 0.1, 0.2, 0.5$  and  $0.8$  respectively. The value of  $\chi$  that corresponds to the value of  $T_h^*$  at which  $P(\psi)$  develops a bimodal, is referred as the critical activity ratio  $\chi^*$ . From the figure, we observe that  $P(\psi)$  become bimodal at  $T_h^* = 40, 35, 35$  and  $30$  respectively for  $\rho^* = 0.1, 0.2, 0.5$  and  $0.8$ . The corresponding  $\chi^* = 17.19, 14.33, 12.24$  and  $9.70$  respectively.

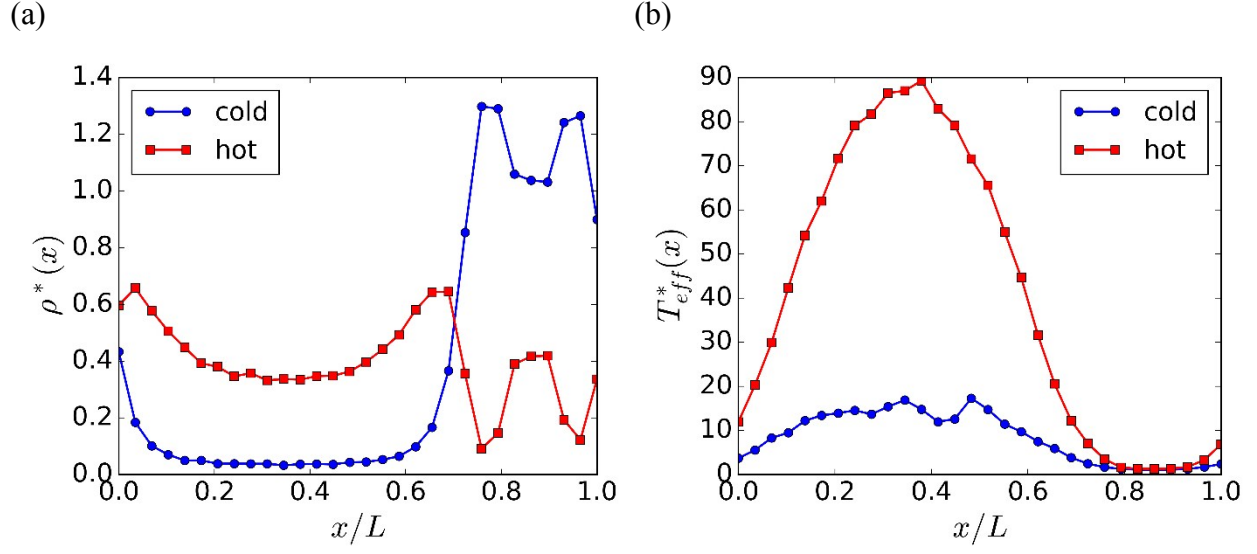

Figure SF10. (color online) Density and effective temperature profiles of the hot and cold particles, depicted in (a) and (b) respectively, for the system with  $N = 8000$  and  $\rho^* = 0.8$  at the imposed hot particles' temperature  $T_h^* = 80$ .
